13. Zhang Z, Wang L: Statistical power analysis for growth curve models using SAS. *Behav Res Methods* 2009; 41:1083–94
14. Saris WE, Satorra A: Power evaluations in structural equation models, Testing structural equation models. Edited by Bollen KA, Long JS. Newbury Park, Sage, 1993
15. Ma W, Eisenach JC: Cyclooxygenase 2 in infiltrating inflammatory cells in injured nerve is universally up-regulated following various types of peripheral nerve injury. *Neuroscience* 2003; 121:691–704
16. Kehlet H, Jensen TS, Woolf CJ: Persistent postsurgical pain: Risk factors and prevention. *Lancet* 2006; 367:1618–25
17. Rivat C, Becker C, Blugeot A, Zeau B, Mauborgne A, Pohl M, Benoliel JJ: Chronic stress induces transient spinal neuroinflammation, triggering sensory hypersensitivity and long-lasting anxiety-induced hyperalgesia. *Pain* 2010; 150:358–68
18. Box G: Science and statistics. *J Am Stat Assoc* 1976; 71:791–9
19. Holt JK: Modeling growth using multilevel and alternative approaches, *Multilevel Analysis of Educational Data*, 3rd edition. Edited by O'Connell AA, McCoach DB. Charlotte, Information Age Publishing, 2008, pp 111–59
20. Raudenbush SW, Bryk AS: *Hierarchical Linear Models: Applications and Data Analysis Methods*, 2nd edition. Thousand Oaks, Sage Publications, 2002
21. Judd CM, McClelland GH, Ryan CS: *Data Analysis: A Model Comparison Approach*, 2nd edition. New York, Routledge, 2008

## ANESTHESIOLOGY REFLECTIONS FROM THE WOOD LIBRARY-MUSEUM

### S. S. Crawford W. Long—From “Liberty” to Death

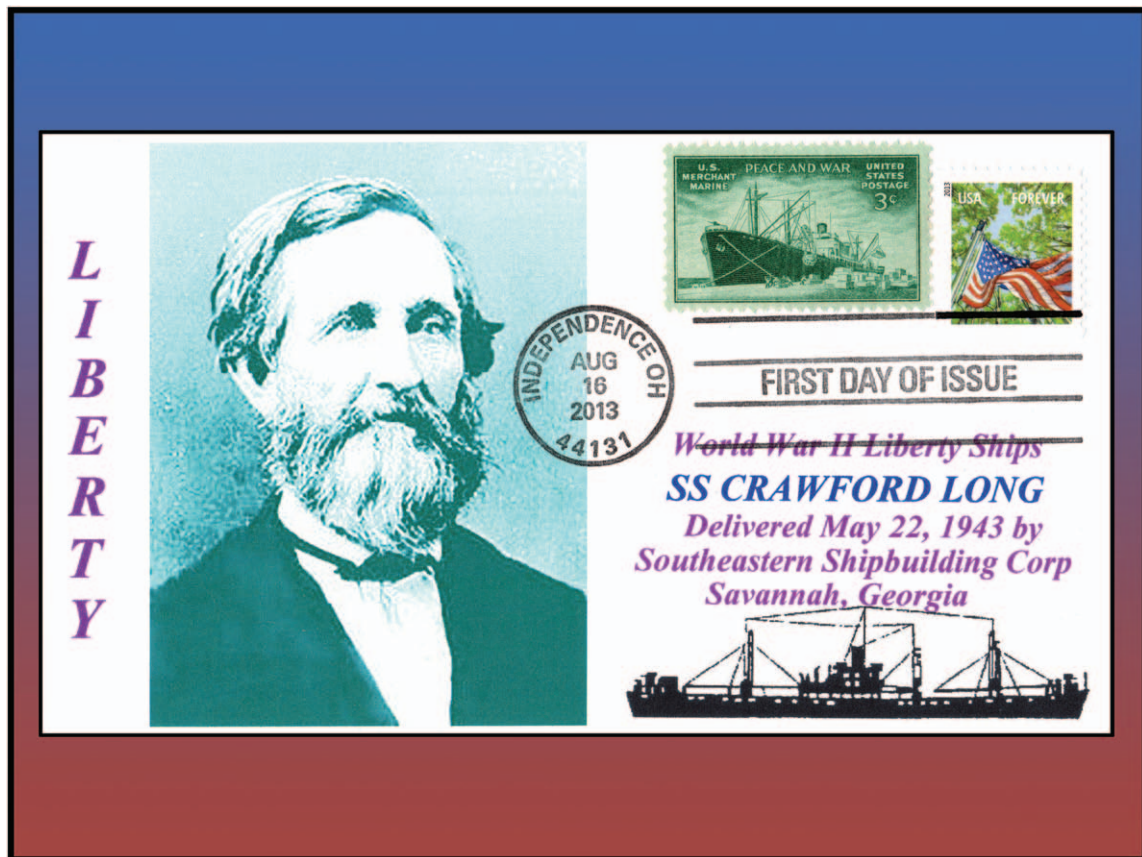

After quoting Patrick Henry's "Give me liberty or give me death," U.S. President Franklin Roosevelt promised that waves of newly built civilian "emergency cargo" ships would bring liberty to Europe. From 1941 to 1945, 18 American shipyards built a total of 2,710 of these, nicknamed "Liberty ships," each able to move over 10,000 tons of cargo and/or passengers. At Savannah's largest industry ever, the Southeastern Shipbuilding Corporation, the ninth of 88 "Libertys" built was the S.S. *Crawford W. Long* (lower right), named for Georgian ether pioneer Crawford Williamson Long, M.D. (left). The S.S. *Crawford W. Long* was delivered for wartime Merchant Marine service on May 22, 1943, just 142 days after its keel had been laid and less than a year before the fall of Berlin. Just 26 years after it was built for the Merchant Marine, the S.S. *Crawford W. Long* was scrapped in 1969. From "Liberty" to death: 1943–1969. (Copyright © the American Society of Anesthesiologists, Inc.)

George S. Bause, M.D., M.P.H., Honorary Curator, ASA's Wood Library-Museum of Anesthesiology, Schaumburg, Illinois, and Clinical Associate Professor, Case Western Reserve University, Cleveland, Ohio. UJYC@aol.com.
